# Supplementary material
Source: PubMed Central journal article supplement (PMC8084870)
Supplement: NIHMS1648045-supplement-Supplemental_Digital_Content_1.pdf [file NIHMS1648045-supplement-Supplemental_Digital_Content_1.pdf]

## Semi Structured Interview Guide

Thank you for agreeing to talk with me about the best way to bring a vision and eye health screening program to the (Hamilton/Hope) Clinic. Our current plan is to have an ophthalmic technician, who is basically like an eye nurse, set up a screening program in your clinic. She will take a health history, check people for glasses, and take measurements and photographs of the eyes to send to the doctor. If someone needs glasses, she will help them pick out free or low-cost glasses on-line. Then, she'll send all of tests to the physician at the University of Michigan who will review the tests and give a recommendation on whether your eyes are healthy or whether it looks like they may have an eye problem that needs to be evaluated in person with an eye doctor. When they come back in 1-2 months to pick up their glasses, the technician will go over the doctor's recommendations and help them to adjust their glasses to fit their face. She will help them schedule an appointment with the eye doctor if they need one.

If participant is a health care provider, ask the following:

What is your role in the clinic?

Could you imagine participating in this eye screening program? Why/why not?

What things would encourage or support you to engage in this type of program?

Do you think people would want to participate in this eye screening program?

What might you think might be some barriers to participating in a glasses and eye health screening program at Hope/Hamilton?

(Probe: Think about and share what things get in the way for you personally to attend health screenings?)

What do you think we could do to facilitate widespread community participation in this glasses and eye health screening program?

I'm going to switch gears and ask you some questions about our glaucoma education program. I'm going to walk through the education program as if you were a patient to get your feedback on it.

After listening to this, can you describe what glaucoma is for me?

What is the program asking you to do next?

What stood out the most from this program?

Now, I'd like to get your feedback on how we might improve the program.

What, if anything, might you want to change?

How, if at all, do you think the wording needs to change to make things most clear for patients?

(Probes: Were any parts confusing? Is anything missing?)
